# Supplementary material for: Oxygen-phosphorus-codoped graphitic carbon nitride nanosheets with better photocatalytic ability towards the degradation of rhodamine-B dyes
Source: Royal Society of Chemistry journal article supplement (doi:10.1039/d3nj02083e), 2023-01-01
Supplement: d3nj02083e1.pdf [file d3nj02083e1.pdf]

**Supplementary materials**

**Oxygen-Phosphorus-codoped graphitic carbon nitride  
nanosheets with better photocatalytic ability towards the  
degradation of Rhodamine-B dyes**

Zhen-Yuan Lan<sup>1</sup>, Dhanapal VASU<sup>1,2</sup>, Yung-Chieh Liu<sup>1,2</sup>, Yu-Feng Yu, Te-Wei Chiu<sup>1,2\*</sup>, and Po Chou Chen<sup>4,5</sup>,

<sup>1</sup>Department of Materials and Mineral Resources Engineering, National Taipei University of Technology, 1, Sec. 3, Zhongxiao E. Rd., Taipei 106, Taiwan.

<sup>2</sup>Institute of Materials Science and Engineering, National Taipei University of Technology, No. 1, Section 3, Chung-Hsiao East Road, Taipei 106, Taiwan

<sup>4</sup>Graduate Institute of Organic and Polymeric Materials, National Taipei University of Technology, Taipei, Taiwan.

<sup>5</sup>E-Current Co Ltd, 10F.-5, No.50, Sec. 4, Nanjing E. Rd., Songshan Dist., Taipei City 10553, Taiwan.

\*Corresponding author: *Email:* [tewei@ntut.edu.tw](mailto:tewei@ntut.edu.tw) (T.-W. Chiu),

RhB photocatalytic degradation using bulk GCN, O and P doped GCN

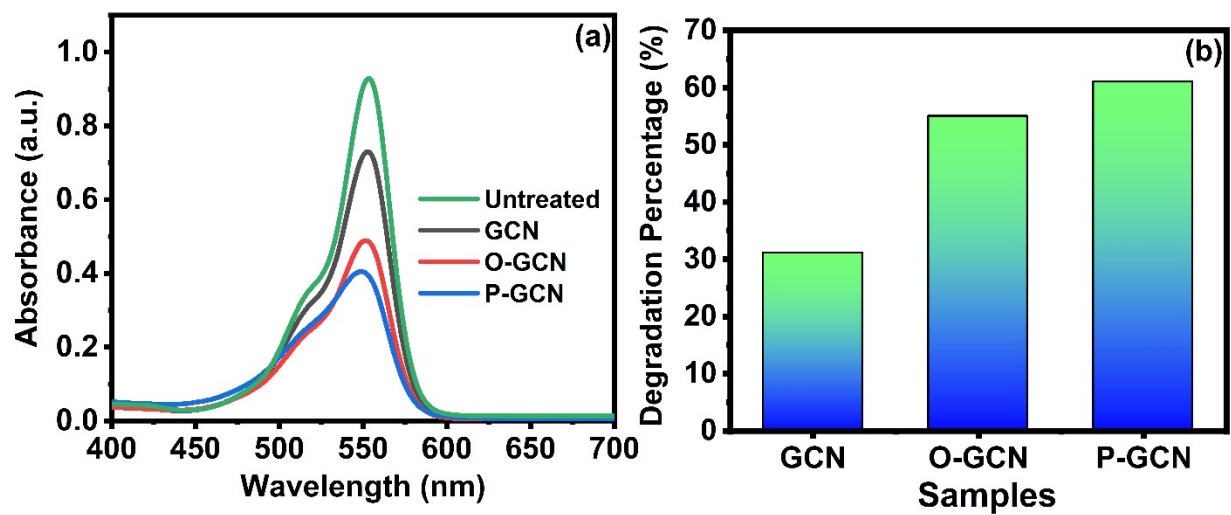

Figure-S1. UV-Visible absorption spectra for RhB during photocatalytic degradation and (b) RhB degradation efficiency
